# Supplementary material for: Functional independence of endogenous μ- and δ-opioid receptors co-expressed in cholinergic interneurons
Source: eLife. 2021 Sep 3;10:e69740. doi: 10.7554/eLife.69740 (PMC8718112; doi:10.7554/eLife.69740)
Supplement: Figure 1—source data 2. [file elife-69740-fig1-data2.xlsx]

## Sheet: Sheet1
FDOR	Exp 1		Exp 2		Exp 3
NAI-A488(nM)	FL ratio	Flratio (+Nlx)	FL ratio	Flratio (+Nlx)	FL ratio	Flratio (+Nlx)
0	0.0128094	0.0140493	0.0150489	0.01473	0.0163407	0.0121589
1	0.0305546	0.0151344	0.0273281	0.0150043	0.0199715	0.0074296
3	0.0548728	0.0169472	0.0333823	0.0142625	0.0265934	0.00782165
10	0.117533	0.0178459	0.0616374	0.0155866	0.0417193	0.00634779
30	0.137797	0.0210677	0.0677716	0.0160955	0.0616577	0.00803138
100	0.150286	0.0359837	0.071622	0.0253125	0.0846544	0.0193206
300			0.0747078	0.0343995	0.0971838	0.0288018
FMOR	Exp 1		Exp 2		Exp 3
NAI-A488(nM)	FL ratio	Flratio (+Nlx)	FL ratio	Flratio (+Nlx)	FL ratio	Flratio (+Nlx)
0	0.0183511	0.0172448	0.0236044	0.0238011	0.0161665	0.017739
1	0.044339	0.0168972	0.038654	0.022149	0.0213891	0.0154768
3	0.0750673	0.0202974	0.0499523	0.0206428	0.0355912	0.0144934
10	0.108031	0.0208609	0.0655785	0.0232238	0.046331	0.0115227
30	0.124341	0.0218721	0.0733405	0.0191881	0.047072	0.0161351
100	0.135717	0.0256248	0.0726393	0.0215107	0.0636085	0.0179164
300			0.0739177	0.0289368	0.0757684	0.0250315
Kd	FDOR	FMOR
exp1	5.187	3.162
exp2	3.533	2.188
exp3	12.57	4.53
