# Supplementary material for: Functional independence of endogenous μ- and δ-opioid receptors co-expressed in cholinergic interneurons
Source: eLife. 2021 Sep 3;10:e69740. doi: 10.7554/eLife.69740 (PMC8718112; doi:10.7554/eLife.69740)
Supplement: Figure 3—figure supplement 1—source data 1. [file elife-69740-fig3-figsupp1-data1.xlsx]

## Sheet: Sheet1
Dorsal
NAI (male)	NAI(female)	NAI+CTAP(male)	NAI+CTAP(female	NAI+SDM(male)	NAI+SDM(Female)
140	144	74	84	59	82
143	152	141	55	85	83
212	165	165	44	64	41
226	132	94	52	55	83
267	87	163	58	96	44
164	230	101	61	68	52
191	244	146	172	44	42
312	219	180	201	42	55
181	194	102	97	79	86
166	219	187	83	103	94
97	155	172	126	70	52
102	126	133	102	42	66
167	169	84	69	67	73
146	230	97	100	97	47
188	93	72	163	68	67
280	109	50	162	49	60
253	99	74	53	36	87
187	183	123	158	48	81
212	137	169	110	43	95
99	175	173	248	64	89
58	189	165	174	45	39
87	259	156	74	42
119	254	153	132	82
164	79	163		59
203	200			69
140	129			32
				41
Ventral
NAI (male)	NAI(female)	NAI+CTAP(male)	NAI+CTAP(female	NAI+SDM(male)	NAI+SDM(Female)
233	149	70	77	90	39
319	153	186	38	112	32
211	118	110	35	78	22
54	111	17	41	85	54
174	225	53	35	42	56
116	230	81	96	119	51
123	84	73	101	66	27
115	143	146	100	66	75
144	139	58	78	53	69
161	169	42	73	78	86
160	114	35	88		58
114	136		49		87
133	181		46
134	164		52
98	90		120
83	211		121
60	156		57
142	160		202
91	228		125
159	215		209
149	196		114
145			72
104			80
65			124
126
107
51
