# Supplementary material for: Functional independence of endogenous μ- and δ-opioid receptors co-expressed in cholinergic interneurons
Source: eLife. 2021 Sep 3;10:e69740. doi: 10.7554/eLife.69740 (PMC8718112; doi:10.7554/eLife.69740)
Supplement: Figure 3—figure supplement 1—source data 2. [file elife-69740-fig3-figsupp1-data2.xlsx]

## Sheet: Sheet1
MOR-KO(dorsal)	MOR-KO(ventral)	+CTAP(dorsal)	+CTAP(ventral)
7653	5312	12333	1872
2984	9615	9192	2835
10386	2928	7389	4185.1
6339	13200	9287	3986.2
4413	12583	8071.8	4895
14383	8959	12433.2	4644
9273	16427	13694.1	9555
14172	8256.5	7921.5	5994.9
8336	5262.7	8168.1	8918.2
13265	2217.9	10263.3	10698.3
10657	14201.6	13904	7573.6
12583	11089.7	12900.4	7262.1
15406		13899.5	8590.6
12238		15198.2	9918
17942		15472.2	9742.1
14694		6311.6	4051.3
15969		10794.1
13406		5644.1	2474.1
4849		11897.2	5747.7
15469		5724.1	6814
17271		2465.4
12459		8563.5
16427		6094.6
12611		6498.5
9792		13192
15590		4633.8
15155		9910.9
14610		11258.2
15890		12087.7
16958		14818
12776		9913.7
12271		8578.8
9125.7
9850.3
9775.3
7829.5
10452.3
6093.8
13208.1
10084.8
4183.6
9086.6
5579.6
14361.3
11625.7
