# Supplementary material for: Functional independence of endogenous μ- and δ-opioid receptors co-expressed in cholinergic interneurons
Source: eLife. 2021 Sep 3;10:e69740. doi: 10.7554/eLife.69740 (PMC8718112; doi:10.7554/eLife.69740)
Supplement: Figure 3—source data 1. [file elife-69740-fig3-data1.xlsx]

## Sheet: Sheet1
Dorsal			Ventral
NAI	NAI+CTAP	NAI+SDM	NAI	NAI+CTAP	NAI+SDM
140	74	59	233	70	90
143	141	85	211	186	112
212	165	64	54	110	78
226	94	55	174	17	85
267	163	96	116	53	42
164	101	68	123	81	39
191	146	44	115	73	32
312	180	42	144	77	22
181	102	79	161	38	54
166	84	82	160	35	56
97	55	83	114	41	51
102	44	41	133	35	27
167	52	83	134	96	75
146	58	44	98	101	69
144	61	52	83	100	86
152	172	42	60	78	58
165	201	55	149	73	87
132	97	86	153	88	119
87	83	94	118	49	66
230	126	52	111	146	66
244	102	66	225	58	53
219	69	73	230	46	78
194	100	47	84	52
219	187	67	143	120
155	172	60	139	121
126	133	87	142	42
188	84	81	91	35
280	163	95	159	57
253	162	89	149	202
187	53	39	169	125
212	158	103	114	209
169	97	70	136	114
230	72	42	181	72
93	50	67	164	80
109	74	97	90	124
99	123	68	211
183	110	49	145
137	248	36	104
175	174	48	65
189	74	43	126
259	132	64	107
99		45	51
58		42	156
87		82	160
119		59	228
254		69	215
79		32	196
200		41
129
164
203
140
