# Supplementary material for: Functional independence of endogenous μ- and δ-opioid receptors co-expressed in cholinergic interneurons
Source: eLife. 2021 Sep 3;10:e69740. doi: 10.7554/eLife.69740 (PMC8718112; doi:10.7554/eLife.69740)
Supplement: Figure 5—source data 1. [file elife-69740-fig5-data1.xlsx]

## Sheet: Sheet1
Delt1µM	DAMGO10µM	ME+CTAP	ME+SDM	ME1µM	ME10µM
115.496	16.625	93.8272	39.5349	100.202	87.9412
67.3077	10.9589	51.7857	29.3333	56.183	60.1191
81.6326	39.1579	77.8846	48.6487	72.6257	106.977
74.7423	44.591	59.292	0.479616	64.5161	88.4793
92.7739	1.5	71.6981	12.2951	105.882	73.8636
74.7573	63.0137	106.091			62.4902
100	12.8079				81.8182
	40.2145				102.273
	42.0455
	52.3338
	29.6296
