# Supplementary material for: Functional independence of endogenous μ- and δ-opioid receptors co-expressed in cholinergic interneurons
Source: eLife. 2021 Sep 3;10:e69740. doi: 10.7554/eLife.69740 (PMC8718112; doi:10.7554/eLife.69740)
Supplement: Figure 5—source data 2. [file elife-69740-fig5-data2.xlsx]

## Sheet: Sheet1
Time(min)	ME
0	88.694	68.0297	79.7508	101.523	66.0661	100.79	85.6833	84.375	107.821	82.6996	54.7085
1	0	4.46097	0	18.2741	3.003	0	35.7918	0	31.8907	3.80228	0
2	14.6199	25.2788	26.1682	8.12183	0	0	1.0846	0	63.022	39.9239	0.896861
3	53.6062	18.5874	110.903	87.3097	54.054	9.88142	46.6377	1.25	48.5953	65.5894	7.17489
4	68.2261	21.5613	171.963	89.3401	57.0571	47.4308	86.7679	1.25	52.3918	79.8479	87.8924
5	73.0994	28.6245	198.131	85.2792	63.0631	65.2174	110.629	1.25	66.0592	81.749	48.4305
Time(min)	ME+CTAP
0	90.7692	38.8959	117.382	99.5475	79.1086
1	9.23077	0	13.544	13.5747	3.34262
2	115.385	2.50941	38.3747	18.0996	101.393
3	106.154	22.5847	110.609	61.8401	95.8217
4	101.538	43.9147	92.5508	69.3816	110.306
5	113.846	57.7164	103.838	73.9065	151.532
Time(min)	ME+SDM
0	87.4919	49.3601	68.7711	103.896	100.917
1	1.94426	0	0	12.987	13.7615
2	0	3.65631	0	2.1645	0
3	0	0	3.38219	30.303	27.5229
4	0	18.2815	25.9301	21.645	11.4679
5	8.42515	14.6252	16.9109	34.632	20.6422
