# Supplementary material for: Functional independence of endogenous μ- and δ-opioid receptors co-expressed in cholinergic interneurons
Source: eLife. 2021 Sep 3;10:e69740. doi: 10.7554/eLife.69740 (PMC8718112; doi:10.7554/eLife.69740)
Supplement: Figure 5—source data 3. [file elife-69740-fig5-data3.xlsx]

## Sheet: Sheet1
DAMGO	DAMGo after Delt	DAMGO after ME	Delt	Delt after DAMGO	Delt after ME
96	100	37.6218	96.4	62.48	12.4822
100	68.9922	48.5611	100	95.07	11.4155
100	100	6.29723	100	86.61	18.552
92	100	29.8748	100	100	18.8016
100	98.5507	55.9322	97	100	30.4124
98		37.4593	100	94.71
100		39.1621	100
			100
			100
			73
