# Supplementary material for: Functional independence of endogenous μ- and δ-opioid receptors co-expressed in cholinergic interneurons
Source: eLife. 2021 Sep 3;10:e69740. doi: 10.7554/eLife.69740 (PMC8718112; doi:10.7554/eLife.69740)
Supplement: Figure 6—source data 1. [file elife-69740-fig6-data1.xlsx]

## Sheet: Sheet1
Figure 6
20 min			5 min
F/F0 Cytoplasm			F/F0 Cytoplasm
ME	Delt	DAMGO	ME	Delt	DAMGO	Buffer
1.53922	1.25169	1.26036	1.05243	1.05114	1.04977	0.990251
1.30182	1.3615	1.07583	1.04041	1.22413	1.05538	1.1083
1.38586	1.6192	1.15379	1.121	1.11874	1.31399	1.10568
1.42971	1.37306	1.05445	1.23362	1.16258	1.10261	1.20605
1.20432	1.62409	1.14087	1.19118	1.11729	1.06801	1.22175
1.31269	1.70332	1.0612	1.13348	1.12348		1.20769
1.46881	1.45575	1.17558	1.05243			1.07035
	1.57494					1.16526
	1.39858
20 min			5 min
F/F0 membrane			F/F0 membrane
ME	Delt	DAMGO	ME	Delt	DAMGO	Buffer
0.835231	0.880555	0.916006	0.980334	0.983719	0.983484	1.00589
0.893527	0.882663	0.960692	0.989188	0.919051	0.984876	0.964052
0.863752	0.814243	0.955633	0.964023	0.959867	0.895952	0.970938
0.86076	0.867877	0.974249	0.933521	0.946573	0.969509	0.937091
0.911158	0.830839	0.946223	0.940009	0.947259	0.975573	0.957617
0.907038	0.810268	0.983285	0.955391	0.956311		0.930095
0.863431	0.860915	0.9486	0.980334			0.9764
	0.833142					0.95427
	0.880109
