# Supplementary material for: Functional independence of endogenous μ- and δ-opioid receptors co-expressed in cholinergic interneurons
Source: eLife. 2021 Sep 3;10:e69740. doi: 10.7554/eLife.69740 (PMC8718112; doi:10.7554/eLife.69740)
Supplement: Table 1—source data 1. [file elife-69740-table1-data1.xlsx]

## Sheet: Sheet1
Table 1
%inhibition
DAMGO(10µM)	DAMGO 1µM	DAMGO after delt	DAMGO after ME	Delt 1µM	Deltorphin after DAMGO	Deltorphin after ME	ME 10µM	ME 1µM	ME 1µM+CTAP	ME 1µM+SDM	morphine(10µM)	morphine (1 µM)	morphine (10µM)+CTAP
98.6245	96	100	37.6218	96.4	100	12.4822	100	94.8	97.1698	90.8759	80.8	75.8571	23.3333
100	100	68.9922	48.5611	100	75.0557	11.4155	100	100	97.6923	100	72.0879	59.6703	15.2685
100	100	100	6.29723	100	100	18.552	100	100	100	92.7419	49.2537	87.4725	3.25733
89.6552	92	100	29.8748	100	86.2069	18.8016	100	80.6	91.1917	100	85.901	20.8955	0
100	100	98.5507	55.9322	97	84	30.4124	100	88.5	100	100	93.7831	41.4169	0
97.3	98		37.4593	100			93.1818	95.4	100	100	94.7059	45.7944	21.2963
100	100		39.1621	100			100	85.6			59.0425	30.0493	6.99405
100				100			100	100			93.1677	30.1449
100				100			100	96.1539			72.7273
100				73			100	100			92.7419
100							100	96.8561
								72.9017
%desensitization
DAMGO10µM	Delt1µM	ME10µM	ME1µM	ME1µM+CTAP	ME1µM+SDM
16.625	115.496	87.9412	100.202	93.8272	39.5349
10.9589	67.3077	60.1191	56.183	51.7857	29.3333
39.1579	81.6326	106.977	72.6257	77.8846	48.6487
44.591	74.7423	88.4793	64.5161	59.292	0.479616
1.5	92.7739	73.8636	105.882	71.6981	12.2951
63.0137	74.7573	62.4902		106.091
12.8079	100	81.8182
40.2145		102.273
42.0455
52.3338
29.6296
